# Supplementary material for: Telomere length and reproductive aging
Source: PubMed Central journal article supplement — Hum Reprod. 2009 Feb 6;24(5):1206–11. doi: 10.1093/humrep/dep007 (PMC2667790; doi:10.1093/humrep/dep007), 2009-02-06

## Supplementary Figure Legends

Supplementary Figure 1. Age (years) compared to telomere length (Kbs) in (a) control group 1,  $n=108$  (b) control group 2,  $n=46$  (c) premature ovarian failure patients  $n=34$ , and (d) recurrent miscarriage,  $n=95$ .

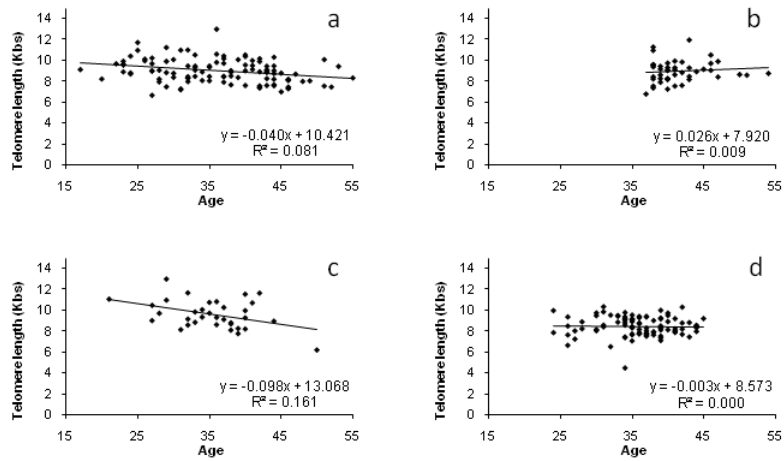

Supplementary Figure 2. Age compared to telomere length (Kbs) in women with recurrent miscarriage with (a) single trisomy ( $n=32$ ) and (b) multiple trisomies ( $n=17$ ).

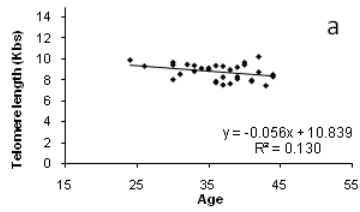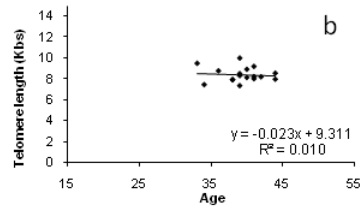

Supplement: dep007_1.pdf [file dep007_1.pdf]
